# Supplementary material for: Measurement of cell respiration and oxygenation in standard multichannel biochips using phosphorescent O2-sensitive probes
Source: Royal Society of Chemistry journal article supplement (doi:10.1039/c3an00658a), 2013-01-01
Supplement: c3an00658a.pdf [file c3an00658a.pdf]

SUPPLEMENTARY INFORMATION

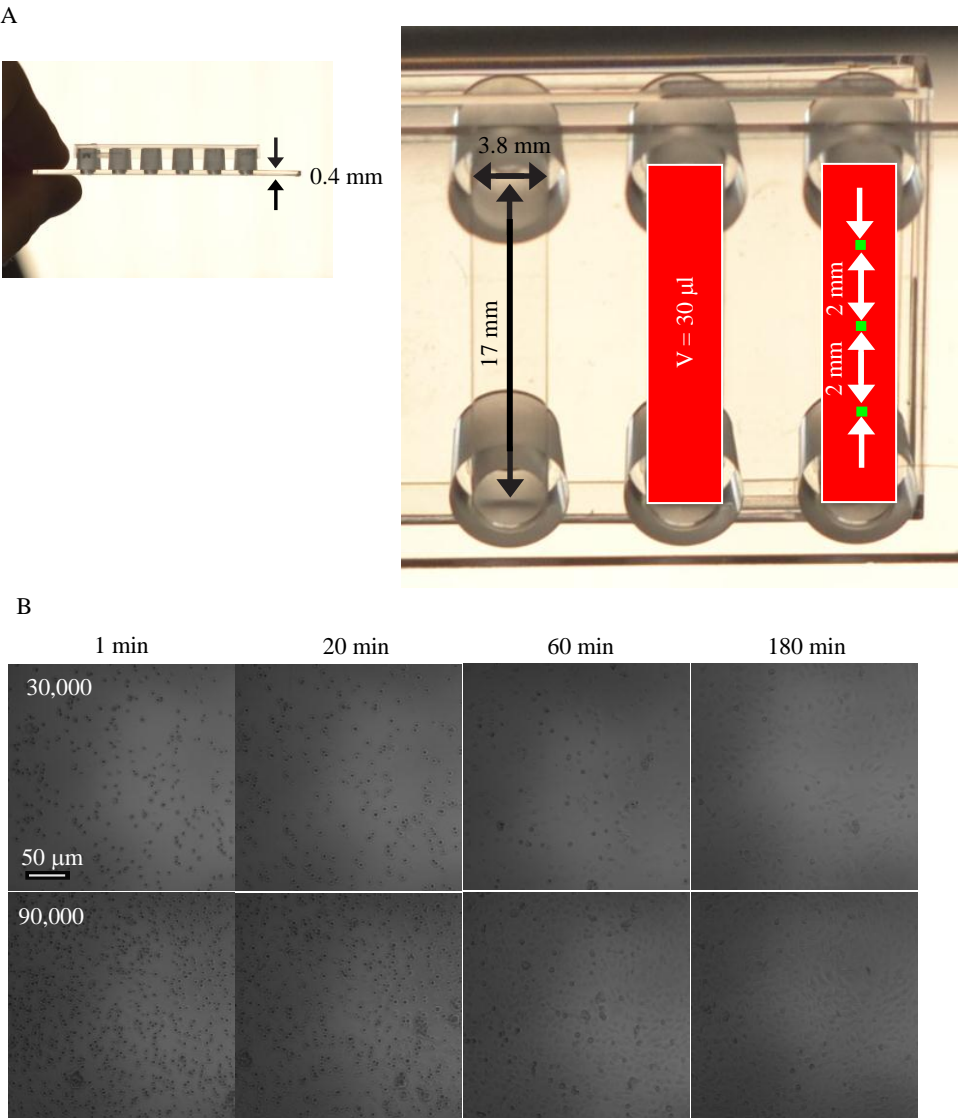

5

**Fig S1: A:** Side (left) and bottom (right) view of the  $\mu$ -slide, with channel dimensions, working volume and points of measurement (3 per channel) shown. **B:** Transmission images of MEF cells in  $\mu$ -slide at two seeding densities during the attachment phase (0-3 h).

10

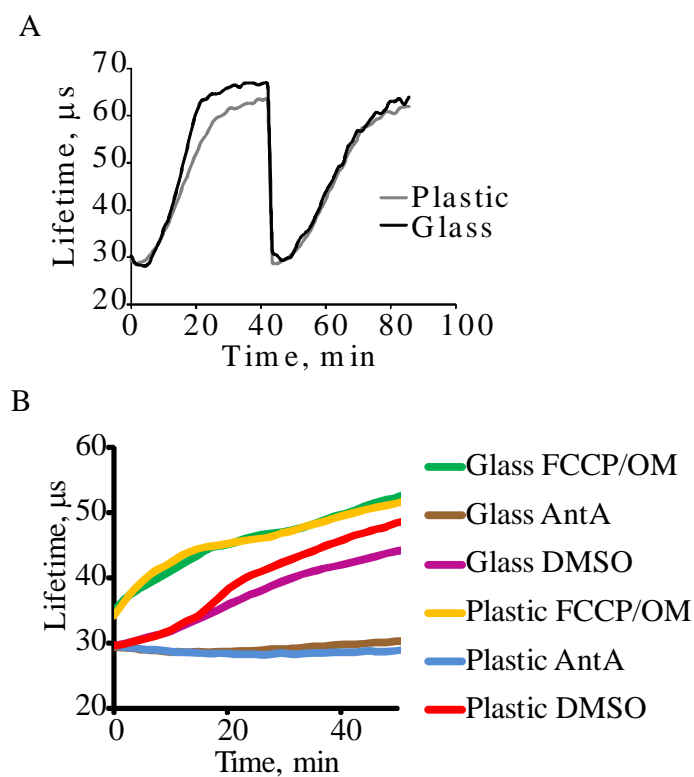

**Fig. S2.** Effects of additional O<sub>2</sub> barrier (glass coated bottom) on respiration profiles of MEF cells. **A.** Resting cells measured in standard  $\mu$ -slide (Plastic) and with additional glass cover slip attached to the bottom (Glass). **B.** Resting and stimulated (10  $\mu$ M AntA, 1  $\mu$ M FCCP/10  $\mu$ M OM) MEF cells measured in standard plastic and glass-bottom 96WP.
